# Supplementary material for: Treatment of Rheumatoid Arthritis with Certolizumab Pegol: Results from PROACTIVE, a Non-Interventional Study in the UK and Ireland
Source: Springer Nature journal article supplement (doi:10.1007/s12325-018-0758-1), 2018-08-03
Supplement: MOESM1 [file 16000188]

**Treatment of Rheumatoid Arthritis with Certolizumab  
Pegol: Results from PROACTIVE, a Non-Interventional  
Study in the UK and Ireland**

**Supplementary Data**

**Supplementary Table 1.** Healthcare resource utilization over 78 weeks

| <b>Mean (SD)</b>                         | <b>Week 12 Responders (n=80)</b> | <b>Week 12 Non-Responders (n=31)</b> |
|------------------------------------------|----------------------------------|--------------------------------------|
| Number of hospitalizations               | 1.00 (0.00)                      | 1.00 (0.00)                          |
| Length of hospitalization stay (days)    | 3.13 (3.27)                      | 2.33 (1.53)                          |
| Number of emergency room visits          | 1.00 (0.00)                      | 1.00 (0.00)                          |
| Number of concomitant medical procedures | 1.00 (0.00)                      | 5.00 (4.24)                          |

Full analysis set (n=111).

**Supplementary Table 2.** Workplace productivity at each visit by Week 12

DAS28(ESR) responder status

| <b>How many days in the last month did the patient miss work because of arthritis?</b>                                  |                           |                  |                               |                  |
|-------------------------------------------------------------------------------------------------------------------------|---------------------------|------------------|-------------------------------|------------------|
|                                                                                                                         | <b>Week 12 Responders</b> |                  | <b>Week 12 Non-Responders</b> |                  |
|                                                                                                                         | <b>n</b>                  | <b>Mean (SD)</b> | <b>n</b>                      | <b>Mean (SD)</b> |
| <i>Baseline</i>                                                                                                         | 42                        | 4.17 (9.02)      | 11                            | 2.09 (4.35)      |
| Week 12                                                                                                                 | 44                        | 1.16 (5.25)      | 11                            | 3.00 (8.98)      |
| Week 26                                                                                                                 | 40                        | 2.73 (7.94)      | 11                            | 5.64 (12.06)     |
| Week 52                                                                                                                 | 33                        | 1.09 (5.41)      | 10                            | 6.40 (12.50)     |
| Week 78                                                                                                                 | 27                        | 1.22 (3.88)      | 6                             | 0.00 (0.00)      |
| <b>How many days in the last month was the patient's productivity at work reduced by half or more due to arthritis?</b> |                           |                  |                               |                  |
|                                                                                                                         | <b>Week 12 Responders</b> |                  | <b>Week 12 Non-Responders</b> |                  |
|                                                                                                                         | <b>n</b>                  | <b>Mean (SD)</b> | <b>n</b>                      | <b>Mean (SD)</b> |
| <i>Baseline</i>                                                                                                         | 42                        | 5.62 (8.29)      | 11                            | 7.82 (10.04)     |
| Week 12                                                                                                                 | 44                        | 2.84 (7.39)      | 11                            | 3.36 (8.97)      |
| Week 26                                                                                                                 | 40                        | 2.18 (5.34)      | 11                            | 5.00 (10.19)     |
| Week 52                                                                                                                 | 33                        | 1.48 (3.81)      | 10                            | 3.60 (9.37)      |
| Week 78                                                                                                                 | 27                        | 1.00 (4.44)      | 6                             | 2.50 (6.12)      |
| <b>In the last month, how much has arthritis interfered with the patient's work productivity? [a]</b>                   |                           |                  |                               |                  |
|                                                                                                                         | <b>Week 12 Responders</b> |                  | <b>Week 12 Non-Responders</b> |                  |
|                                                                                                                         | <b>n</b>                  | <b>Mean (SD)</b> | <b>n</b>                      | <b>Mean (SD)</b> |
| <i>Baseline</i>                                                                                                         | 42                        | 5.02 (3.11)      | 11                            | 4.09 (2.98)      |
| Week 12                                                                                                                 | 44                        | 2.18 (2.94)      | 11                            | 3.18 (3.06)      |
| Week 26                                                                                                                 | 40                        | 2.95 (3.58)      | 11                            | 4.55 (3.62)      |
| Week 52                                                                                                                 | 33                        | 1.30 (2.16)      | 10                            | 3.20 (3.91)      |
| Week 78                                                                                                                 | 27                        | 1.56 (2.36)      | 6                             | 1.33 (3.27)      |

Full analysis set. Answered by employed patients only. [a] 0–10 scale, where 0=no interference and 10=complete interference.

**Supplementary Table 3.** Household productivity at each visit by Week 12

DAS28(ESR) responder status

| <b>How many days in the last month did the patient not do household work because of arthritis?</b>                     |                           |                  |                               |                  |
|------------------------------------------------------------------------------------------------------------------------|---------------------------|------------------|-------------------------------|------------------|
|                                                                                                                        | <b>Week 12 Responders</b> |                  | <b>Week 12 Non-Responders</b> |                  |
|                                                                                                                        | <b>n</b>                  | <b>Mean (SD)</b> | <b>n</b>                      | <b>Mean (SD)</b> |
| <i>Baseline</i>                                                                                                        | 79                        | 9.75 (9.78)      | 27                            | 10.15 (10.78)    |
| Week 12                                                                                                                | 79                        | 5.04 (8.03)      | 28                            | 7.82 (10.41)     |
| Week 26                                                                                                                | 72                        | 5.51 (8.27)      | 25                            | 7.96 (11.69)     |
| Week 52                                                                                                                | 63                        | 5.19 (8.39)      | 19                            | 2.37 (4.31)      |
| Week 78                                                                                                                | 50                        | 6.08 (10.27)     | 17                            | 6.47 (9.96)      |
| <b>How many days in the last month was productivity in the household reduced by half or more due to arthritis?</b>     |                           |                  |                               |                  |
|                                                                                                                        | <b>Week 12 Responders</b> |                  | <b>Week 12 Non-Responders</b> |                  |
|                                                                                                                        | <b>n</b>                  | <b>Mean (SD)</b> | <b>n</b>                      | <b>Mean (SD)</b> |
| <i>Baseline</i>                                                                                                        | 79                        | 8.30 (9.27)      | 27                            | 8.26 (9.58)      |
| Week 12                                                                                                                | 76                        | 5.30 (7.93)      | 28                            | 7.04 (10.14)     |
| Week 26                                                                                                                | 72                        | 4.21 (5.93)      | 25                            | 6.88 (10.31)     |
| Week 52                                                                                                                | 62                        | 3.66 (6.09)      | 19                            | 7.05 (9.72)      |
| Week 78                                                                                                                | 50                        | 3.70 (7.96)      | 17                            | 6.59 (8.95)      |
| <b>How many days in the last month did the patient miss family, social or leisure activities because of arthritis?</b> |                           |                  |                               |                  |
|                                                                                                                        | <b>Week 12 Responders</b> |                  | <b>Week 12 Non-Responders</b> |                  |
|                                                                                                                        | <b>n</b>                  | <b>Mean (SD)</b> | <b>n</b>                      | <b>Mean (SD)</b> |
| <i>Baseline</i>                                                                                                        | 79                        | 3.52 (6.22)      | 27                            | 3.52 (7.71)      |
| Week 12                                                                                                                | 78                        | 1.42 (4.88)      | 28                            | 1.29 (2.62)      |
| Week 26                                                                                                                | 72                        | 1.49 (4.06)      | 25                            | 2.08 (6.06)      |
| Week 52                                                                                                                | 63                        | 1.43 (5.00)      | 19                            | 1.74 (4.68)      |
| Week 78                                                                                                                | 50                        | 1.84 (6.10)      | 17                            | 4.53 (10.00)     |
| <b>How many days in the last month did the patient have to hire outside help because of arthritis?</b>                 |                           |                  |                               |                  |
|                                                                                                                        | <b>Week 12 Responders</b> |                  | <b>Week 12 Non-Responders</b> |                  |
|                                                                                                                        | <b>n</b>                  | <b>Mean (SD)</b> | <b>n</b>                      | <b>Mean (SD)</b> |
| <i>Baseline</i>                                                                                                        | 79                        | 0.76 (2.47)      | 27                            | 1.07 (3.89)      |
| Week 12                                                                                                                | 78                        | 1.10 (4.71)      | 28                            | 1.64 (5.91)      |
| Week 26                                                                                                                | 72                        | 0.75 (3.64)      | 25                            | 0.84 (2.38)      |
| Week 52                                                                                                                | 63                        | 0.81 (4.05)      | 19                            | 0.95 (3.29)      |

RA-PROACTIVE Supplementary Data

|                                                                                                                   |                           |                    |                               |                    |
|-------------------------------------------------------------------------------------------------------------------|---------------------------|--------------------|-------------------------------|--------------------|
| Week 78                                                                                                           | 50                        | 1.76 (6.08)        | 17                            | 0.82 (2.56)        |
| <b>In the last month, how much has arthritis interference with the patient's household work productivity? [a]</b> |                           |                    |                               |                    |
|                                                                                                                   | <b>Week 12 Responders</b> |                    | <b>Week 12 Non-Responders</b> |                    |
|                                                                                                                   | <b>n</b>                  | <b>Mean (SD)</b>   | <b>n</b>                      | <b>Mean (SD)</b>   |
| <i>Baseline</i>                                                                                                   | <i>79</i>                 | <i>6.13 (3.30)</i> | <i>27</i>                     | <i>5.89 (2.81)</i> |
| Week 12                                                                                                           | 77                        | 3.39 (3.16)        | 28                            | 4.64 (3.70)        |
| Week 26                                                                                                           | 72                        | 3.53 (3.67)        | 25                            | 4.16 (3.52)        |
| Week 52                                                                                                           | 63                        | 3.00 (3.20)        | 19                            | 3.32 (3.04)        |
| Week 78                                                                                                           | 50                        | 3.14 (3.56)        | 17                            | 3.59 (3.55)        |

Full analysis set. [a] 0–10 scale, where 0=no interference and 10=complete interference.

**Supplementary Table 4.** PASS response at each visit by Week 12 DAS28(ESR) responder status

| n (%)           | Week 12 Responders<br>(n=80) | Week 12 Non-Responders<br>(n=31) |
|-----------------|------------------------------|----------------------------------|
| <i>Baseline</i> | 7 (8.8)                      | 3 (9.7)                          |
| Week 12         | 56 (70.0)                    | 6 (19.4)                         |
| Week 26         | 50 (62.5)                    | 10 (32.3)                        |
| Week 52         | 48 (60.0)                    | 14 (45.2)                        |
| Week 78         | 36 (45.0)                    | 10 (32.3)                        |

Full analysis set (n=111). Patients were asked to rate their current symptom state by answering the following question with a 'Yes/No' response: "Considering the full range of activities you engage in as part of your normal everyday life, your level of pain, and your level of disability, if you were to remain in your present condition for the next few months, would you consider your current health state satisfactory?". [The numbers above correspond to the proportion of patients who responded 'Yes'.](#)

DAS28(ESR): 28-joint count disease activity score, calculated with erythrocyte sedimentation rate;

PASS: Patient acceptable symptom state.

**Supplementary Table 5.** EQ-5D-3L responses at baseline and Week 78

| <b>Summary of EQ-5D-3L health status (visual analogue scale) [a]</b> |                                  |                           |                                      |
|----------------------------------------------------------------------|----------------------------------|---------------------------|--------------------------------------|
| <b>Mean (SD)</b>                                                     | <b>Week 12 Responders (n=80)</b> |                           | <b>Week 12 Non-Responders (n=31)</b> |
| Baseline                                                             | 49.7 (22.05)                     |                           | 48.4 (14.41)                         |
| Week 78                                                              | 62.9 (26.74)                     |                           | 54.2 (25.19)                         |
| <b>Mobility</b>                                                      |                                  |                           |                                      |
| <b>n (%) [b]</b>                                                     | <b>Response</b>                  | <b>Week 12 Responders</b> | <b>Week 12 Non-Responders</b>        |
| Baseline                                                             | n                                | 80                        | 31                                   |
|                                                                      | No problems                      | 14 (17.5)                 | 4 (12.9)                             |
|                                                                      | Some problems                    | 66 (82.5)                 | 27 (87.1)                            |
|                                                                      | Unable to do                     | 0                         | 0                                    |
| Week 78                                                              | n                                | 63                        | 23                                   |
|                                                                      | No problems                      | 28 (44.4)                 | 9 (39.1)                             |
|                                                                      | Some problems                    | 35 (55.6)                 | 14 (60.9)                            |
|                                                                      | Unable to do                     | 0                         | 0                                    |
| <b>Self-care</b>                                                     |                                  |                           |                                      |
| <b>n (%) [b]</b>                                                     | <b>Response</b>                  | <b>Week 12 Responders</b> | <b>Week 12 Non-Responders</b>        |
| Baseline                                                             | n                                | 80                        | 31                                   |
|                                                                      | No problems                      | 26 (32.5)                 | 7 (22.6)                             |
|                                                                      | Some problems                    | 51 (63.8)                 | 23 (74.2)                            |
|                                                                      | Unable to do                     | 3 (3.8)                   | 1 (3.2)                              |
| Week 78                                                              | n                                | 64                        | 23                                   |
|                                                                      | No problems                      | 38 (59.4)                 | 10 (43.5)                            |
|                                                                      | Some problems                    | 24 (37.5)                 | 12 (52.2)                            |
|                                                                      | Unable to do                     | 2 (3.1)                   | 1 (4.3)                              |
| <b>Usual activities</b>                                              |                                  |                           |                                      |
| <b>n (%) [b]</b>                                                     | <b>Response</b>                  | <b>Week 12 Responders</b> | <b>Week 12 Non-Responders</b>        |
| Baseline                                                             | n                                | 80                        | 31                                   |
|                                                                      | No problems                      | 8 (10.0)                  | 1 (3.2)                              |
|                                                                      | Some problems                    | 64 (80.0)                 | 25 (80.6)                            |
|                                                                      | Unable to do                     | 8 (10.0)                  | 5 (16.1)                             |
| Week 78                                                              | n                                | 64                        | 23                                   |
|                                                                      | No problems                      | 24 (37.5)                 | 9 (39.1)                             |

## RA-PROACTIVE Supplementary Data

|                           | Some problems   | 35 (54.7)                     | 12 (52.2)                         |
|---------------------------|-----------------|-------------------------------|-----------------------------------|
|                           | Unable to do    | 5 (7.8)                       | 2 (8.7)                           |
| <b>Pain/Discomfort</b>    |                 |                               |                                   |
| <b>n (%)<br/>[b]</b>      | <b>Response</b> | <b>Week 12<br/>Responders</b> | <b>Week 12<br/>Non-Responders</b> |
| Baseline                  | n               | 80                            | 31                                |
|                           | No problems     | 0                             | 1 (3.2)                           |
|                           | Some problems   | 66 (82.5)                     | 24 (77.4)                         |
|                           | Unable to do    | 14 (17.5)                     | 6 (19.4)                          |
| Week 78                   | n               | 64                            | 22                                |
|                           | No problems     | 15 (23.4)                     | 4 (18.2)                          |
|                           | Some problems   | 42 (65.6)                     | 14 (63.6)                         |
|                           | Unable to do    | 7 (10.9)                      | 4 (18.2)                          |
| <b>Anxiety/Depression</b> |                 |                               |                                   |
| <b>n (%)<br/>[b]</b>      | <b>Response</b> | <b>Week 12<br/>Responders</b> | <b>Week 12<br/>Non-Responders</b> |
| Baseline                  | n               | 80                            | 30                                |
|                           | No problems     | 37 (46.3)                     | 12 (40.0)                         |
|                           | Some problems   | 40 (50.0)                     | 16 (53.3)                         |
|                           | Unable to do    | 3 (3.8)                       | 2 (6.7)                           |
| Week 78                   | n               | 64                            | 23                                |
|                           | No problems     | 47 (73.4)                     | 18 (78.3)                         |
|                           | Some problems   | 13 (20.3)                     | 4 (17.4)                          |
|                           | Unable to do    | 4 (6.3)                       | 1 (4.3)                           |

Full analysis set. [a] LOCF imputation; 100 mm scale, where 0=worst imaginable health state and 100=best imaginable health state. [b] Percentages for the total headcount by dimension. EQ-5D-3L: Euro Quality of Life with 5 dimensions and 3 levels questionnaire; LOCF: Last observation carried forward.



**Supplementary Figure 1.** DAS28(ESR) response at Week 78 by Week 12

DAS28(ESR) responder status – RF and ACPA subgroup analyses

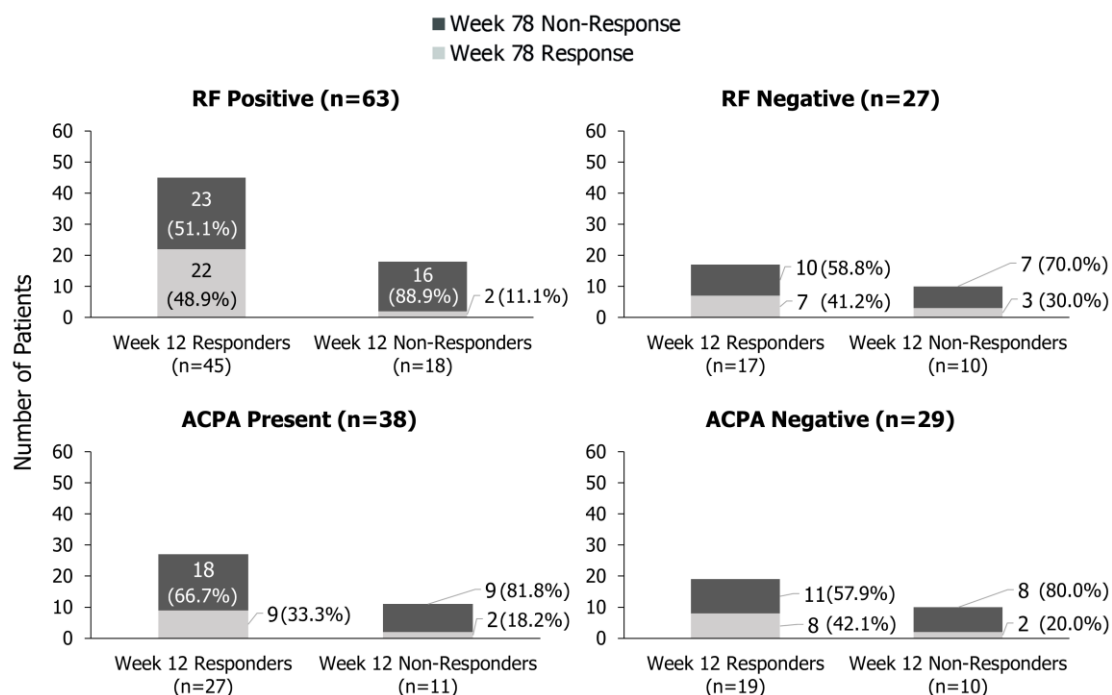

NRI imputation. ACPA: Anti-citrullinated peptide antibodies; DAS28(ESR): 28-joint count disease activity score, calculated with erythrocyte sedimentation rate; NRI: Non-responder imputation; RF: Rheumatoid factor.
